# Supplementary material
Source: MDPI journal article supplement (https://www.mdpi.com/2076-3298/6/7/78)
Supplement: s1 [file s1]

## Supplementary information

**Table S1: Soil chemistry for 2016 samples and USGS soil and sediment samples 2007–2009**

In the table below, key chemical analytes of soil and drill cuttings samples are compared to data collected by USGS at nearby sites. Each of the soil samples we collected in 2016 for laboratory analysis is compared with nearby soil data from samples collected by the USGS in 2007–2009. Where USGS soil samples were unavailable, we compared data to USGS pond sediment samples. Since drilling intensified in 2004, some sites may have been already contaminated with drill disposal waste, which could be the reason for some pond sediment with chemistry different from nearby sites. However, the median should provide a good semblance of natural background soil for comparison to our samples. Median and ranges shown are for USGS samples only, for comparison to samples we collected in 2016 of background soil and drill cuttings. All USGS samples have a PB identifier. Notes regarding samples are from the USGS database site or sample description. Data is from the USGS Geochemical Database available at <https://pubs.usgs.gov/ds/608/downloads/Geochemical%20Relational%20Database/PebbleGeochem.xls/>

| Sample type     | Site notes                                        | Site ID            | pH  | As mg/kg | Cu mg/kg | Fe % | Mo mg/kg | Zn mg/kg |
|-----------------|---------------------------------------------------|--------------------|-----|----------|----------|------|----------|----------|
| Soil / cuttings | 2016 sample                                       | DDH 3129           | 3.2 | 108      | 1,650    | 3.4  | 215      | 68       |
| sediment        | near discovery, iron-staining, efflorescent salts | PB130              | na  | 4        | 2,400    | 1.9  | 7        | 43       |
| sediment        | drillsite upgradient                              | PB131              | na  | 7        | 272      | 0.3  | 1        | 53       |
| sediment        |                                                   | PB131D             | na  | 8        | 448      | 0.3  | 2        | 53       |
| sediment        | 30' downgradient from DDH 3125                    | PB132 <sup>a</sup> | na  | 8        | 31       | 0.5  | 1        | 89       |
| sediment        |                                                   | PB133              | na  | 10       | 18       | 0.5  | 1        | 87       |
| sediment        | Large pond                                        | PB134              | na  | 9        | 11       | 0.6  | 1        | 74       |
| sediment        | PB026 at north end                                | PB254              | na  | 17       | 744      | 0.6  | 2        | 86       |
| sediment        | PB026 re-sample                                   | PB255              | na  | 9        | 292      | 0.4  | 1        | 67       |
| sediment        | 50 ft from DDH 3122                               | PB256              | na  | 13       | 703      | 0.4  | 8        | 59       |
|                 |                                                   | median             |     | 9        | 292      | 0.5  | 1        | 67       |
|                 | Pond sediment:                                    | min                |     | 4        | 11       | 0.3  | 1        | 43       |
|                 |                                                   | max                |     | 17       | 2400     | 1.9  | 8        | 89       |

<sup>a</sup> USGS data sheets note that “drill mud appears to have flowed into pond”

| Sample type     | Site Notes                         | Site ID  | pH  | As mg/kg | Cu mg/kg | Fe % | Mo mg/kg | Zn mg/kg |
|-----------------|------------------------------------|----------|-----|----------|----------|------|----------|----------|
| Soil / cuttings | 2016                               | DDH 4171 | 5.7 | 14       | 545      | 3.8  | 17       | 139      |
| Soil / cuttings | 2016                               | DDH12548 | 6   | 13       | 655      | 3.9  | 22       | 149      |
| soil            | about 0.5 km ENE of old drill camp | PB021    | 4.9 | 8        | 23       | 0.4  | 1        | 53       |
| soil            | not recorded                       | PB022    | 5.2 | 10       | 29       | 0.4  | 1        | 56       |
| soil            | 40 m from DDH 4285                 | PB023    | 5.4 | 13       | 28       | 0.4  | 1        | 53       |
| soil            | 75m from DDH 4305                  | PB024    | 4.9 | 14       | 30       | 0.5  | 1        | 73       |
| soil            | not recorded                       | PB027    | 4.9 | 12       | 40       | 0.4  | 1        | 69       |
| soil            | 8 m from DDH4281                   | PB029    | 5.0 | 14       | 37       | 0.5  | 1        | 72       |
| soil            | seep SP27 nearby                   | PB030    | 4.1 | 14       | 735      | 0.6  | 10       | 78       |
| soil            | not recorded                       | PB031    | 5.0 | 10       | 92       | 0.3  | 3        | 49       |
| soil            | not recorded                       | PB066    | 5.2 | 37       | 36       | 0.6  | 2        | 87       |
| soil            | not recorded                       | PB067    | 5.6 | 22       | 28       | 0.6  | 1        | 75       |
| pond sediment   | same as 07PB070 <sup>b</sup>       | PB137    | na  | 4        | 2080     | 0.2  | 1        | 125      |
|                 |                                    | median   |     | 5.0      | 14       | 0.5  | 1        | 71       |
|                 | Soil only:                         | min      |     | 4.1      | 8        | 0.3  | 1        | 49       |
|                 | :                                  | max      |     | 5.6      | 37       | 0.6  | 10       | 87       |

<sup>b</sup> No data for 07PB070 were found in USGS datasheets

| Sample type     | Site notes                                 | Site ID  | pH  | As<br>mg/kg | Cu<br>mg/kg | Fe<br>% | Mo<br>mg/kg | Zn<br>mg/kg |
|-----------------|--------------------------------------------|----------|-----|-------------|-------------|---------|-------------|-------------|
| soil / cuttings | 2016                                       | DDH 6355 | 2.7 | 242         | 4,865       | 4.1     | 645         | 242         |
| soil / cuttings | 2016                                       | GH08-111 | 4.3 | 83          | 615         | 1.6     | 163         | 54          |
| sediment        | large pond                                 | PB140    | na  | 4           | 14          | 0.4     | 1           | 88          |
| sediment        | snow present                               | PB141    | na  | 4           | 15          | 0.3     | 1           | 71          |
| sediment        | large, deep pond                           | PB142    | na  | 8           | 13          | 0.4     | 1           | 56          |
| sediment        | grassy bottom                              | PB145    | na  | 57          | 14          | 0.4     | 4           | 67          |
| sediment        | deep, beaver dam                           | PB146    | na  | 7           | 19          | 0.4     | 1           | 81          |
| sediment        | near drill rig 6                           | PB147    | na  | 4           | 14          | 0.3     | 3           | 51          |
| sediment        | large pond<br>between active<br>drill rigs | PB150    | na  | 3           | 11          | 0.4     | 1           | 76          |
| sediment        | lake near drill rigs                       | PB151    | na  | 4           | 11          | 0.1     | 1           | 23          |
| sediment        | just east of “finger<br>lakes”             | PB152    | na  | 5           | 14          | 0.3     | 1           | 61          |
|                 |                                            | median   |     | 4           | 14          | 0.4     | 1           | 67          |
|                 | Pond sediment:                             | min      |     | 3           | 11          | 0.1     | 1           | 23          |
|                 |                                            | max      |     | 57          | 19          | 0.4     | 4           | 88          |

| Sample type     | Site Notes                                                                  | Site ID  | pH  | As<br>mg/kg | Cu<br>mg/kg | Fe<br>% | Mo<br>mg/kg | Zn<br>mg/kg |
|-----------------|-----------------------------------------------------------------------------|----------|-----|-------------|-------------|---------|-------------|-------------|
| soil / cuttings | 2016                                                                        | DDH 7392 | 2.9 | 15          | 1203        | 2.3     | 398         | 11          |
| soil            | 4” thick tundra                                                             | PB257    | 5.7 | 12          | 33          | 0.5     | 1           | 81          |
| soil            | 10” thick tundra                                                            | PB258    | 5.4 | 25          | 92          | 0.6     | 2           | 74          |
| soil            | Tundra                                                                      | PB259    | 5.2 | 19          | 85          | 0.5     | 2           | 85          |
| soil            | orange-stained (on<br>fractures) rubble crop.<br>Indicates pyrite?          | PB260    | 5.6 | 23          | 147         | 0.6     | 3           | 88          |
| soil            | Orange-stained pyritic<br>(?) angular fragments of<br>hornfels. Rubblecrop? | PB261    | 5.8 | 14          | 36          | 0.6     | 1           | 82          |
| soil            | expect higher metal<br>content                                              | PB262    | 5.4 | 15          | 30          | 0.6     | 2           | 66          |
| soil            | alder patches                                                               | PB263    | 5.1 | 15          | 36          | 0.5     | 1           | 80          |
| soil            | blueberry bushes                                                            | PB264    | 5.8 | 13          | 42          | 0.5     | 1           | 79          |
|                 |                                                                             | median   | 5.5 | 15          | 39          | 0.6     | 1           | 81          |
|                 | Soil:                                                                       | min      | 5.1 | 12          | 30          | 0.5     | 1           | 66          |
|                 |                                                                             | max      | 5.8 | 25          | 147         | 0.6     | 3           | 88          |

| Sample type        | Site notes                                  | Site ID   | pH  | As<br>mg/kg | Cu<br>mg/kg | Fe<br>% | Mo<br>mg/kg | Zn<br>mg/kg |
|--------------------|---------------------------------------------|-----------|-----|-------------|-------------|---------|-------------|-------------|
| soil / cuttings    | 2016                                        | GH05-60   | 3.6 | 14          | 129         | 3.4     | 16          | 48          |
| buried drill waste | 2016                                        | DDH 11540 | 6.3 | 4           | 475         | 2.0     | 38          | 33          |
| sediment           | small pond                                  | PB159     | na  | 19          | 218         | 0.6     | 9           | 102         |
| sediment           | large pond                                  | PB160     | na  | 23          | 228         | 0.5     | 16          | 84          |
| sediment           | beaver lodge                                | PB161     | na  | 11          | 109         | 0.5     | 5           | 91          |
| sediment           | large pond fringed with grass; beaver lodge | PB162     | na  | 13          | 80          | 0.4     | 4           | 81          |
|                    |                                             | median    |     | 16          | 164         | 0.5     | 7           | 88          |
|                    | Pond sediment:                              | min       |     | 11          | 80          | 0.4     | 4           | 81          |
|                    |                                             | max       |     | 23          | 228         | 0.6     | 16          | 102         |

| Sample type | Site notes                   | Site ID  | pH  | As<br>mg/kg | Cu<br>mg/kg | Fe<br>% | Mo<br>mg/kg | Zn<br>mg/kg |
|-------------|------------------------------|----------|-----|-------------|-------------|---------|-------------|-------------|
| soil        | 2016                         | DDH 5324 | 6.2 | 5           | 7           | 1.6     | 0.3         | 24          |
| soil        | 9 m from DDH4300             | PB078    | 5.5 | 10          | 21          | 0.5     | 1           | 77          |
| soil        | not recorded                 | PB079    | 5.4 | 13          | 27          | 0.5     | 1           | 80          |
| soil        | not recorded                 | PB080    | 5.6 | 12          | 23          | 0.4     | 1           | 82          |
| soil        | 60 m from water site 07PB082 | PB081    | 4.9 | 11          | 20          | 0.4     | 1           | 84          |
| soil        | not recorded                 | PB083    | 5.1 | 14          | 18          | 0.5     | 1           | 82          |
| soil        | not recorded                 | PB084    | 5.2 | 8           | 13          | 0.4     | 1           | 55          |
| soil        | near DDH5327                 | PB085    | 4.7 | 5           | 12          | 0.3     | 1           | 45          |
|             |                              | median   | 5.2 | 11          | 20          | 0.4     | 1           | 80          |
|             | Soil:                        | min      | 4.7 | 5           | 12          | 0.3     | 1           | 45          |
|             |                              | max      | 5.6 | 14          | 27          | 0.5     | 1           | 84          |

| Sample type | Site notes                        | Site ID   | pH  | As<br>mg/kg | Cu<br>mg/kg | Fe<br>% | Mo<br>mg/kg | Zn<br>mg/kg |
|-------------|-----------------------------------|-----------|-----|-------------|-------------|---------|-------------|-------------|
| soil        | 2016                              | DDH 12557 | 5.1 | 7           | 86          | 1.9     | 3           | 32          |
| sediment    | beaver raising dam                | PB170     | na  | 12          | 68          | 0.4     | 4           | 66          |
| sediment    | beaver raising dam,<br>large pond | PB172     | na  | 14          | 177         | 0.3     | 13          | 52          |
|             |                                   | median    |     | 13          | 123         | 0.3     | 8           | 59          |
|             | Pond sediment:                    | min       |     | 12          | 68          | 0.3     | 4           | 52          |
|             |                                   | max       |     | 14          | 177         | 0.4     | 13          | 66          |

| Sample type    | Site notes                                    | Site ID  | pH  | As<br>mg/kg | Cu<br>mg/kg | Fe<br>mg/kg | Mo<br>mg/kg | Zn<br>mg/kg |
|----------------|-----------------------------------------------|----------|-----|-------------|-------------|-------------|-------------|-------------|
| soil           | 2016                                          | DDH11527 | 5.1 | 4           | 28          | 15398       | 1           | 28          |
| drill cuttings | 2008 (USGS)                                   | PB180    | na  | 191         | 1320        | 5.4%        | 104         | 47          |
| soil           | site is NW of drill hole<br>DH4192            | PB033    | 5.5 | 14          | 96          | 4480        | 2           | 74          |
| soil           | duplicate                                     | PB033D   | 5.8 | 15          | 102         | 4640        | 2           | 84          |
| soil           | not recorded                                  | PB036    | 5.5 | 15          | 89          | 4800        | 2           | 78          |
| soil           | 90 m from weathered<br>'discovery' hill       | PB037    | 4.2 | 11          | 65          | 3220        | 2           | 55          |
| soil           | not recorded                                  | PB038    | 4.9 | 9           | 29          | 3480        | 2           | 42          |
| soil           | 10 m S of traverse line<br>due to heavy brush | PB039    | 5.6 | 22          | 435         | 5380        | 5           | 82          |
| soil           | near top of hill<br>('discovery' outcrop?)    | PB040    | 5.8 | 78          | 1830        | 6510        | 27          | 94          |
| soil           | near 'discovery' outcrop                      | PB041    | 6.0 | 57          | 1800        | 6380        | 24          | 118         |
| soil           | not recorded                                  | PB042    | 4.4 | 10          | 117         | 2910        | 4           | 39          |
| soil           | not recorded                                  | PB044    | 4.8 | 10          | 33          | 3440        | 2           | 58          |
| soil           | not recorded                                  | PB045    | 5.1 | 17          | 225         | 4830        | 5           | 76          |
| soil           | about 20m from<br>DDH3082                     | PB046    | 5.9 | 20          | 490         | 5850        | 7           | 90          |
|                |                                               | median   | 5.5 | 15          | 110         | 4720        | 3           | 77          |
|                | Soil:                                         | min      | 4.2 | 9           | 29          | 2910        | 2           | 39          |
|                |                                               | max      | 6.0 | 78          | 1830        | 6510        | 27          | 118         |

---

| Sample<br>type  | Site<br>notes                                          | Site<br>ID | pH  | As<br>mg/kg               | Cu<br>mg/kg | Fe<br>% | Mo<br>mg/kg | Zn<br>mg/kg |
|-----------------|--------------------------------------------------------|------------|-----|---------------------------|-------------|---------|-------------|-------------|
| soil / cuttings | 2016                                                   | DDH 5326   | 6.4 | <i>na – field pH only</i> |             |         |             |             |
| soil            | not recorded                                           | PB69       | 4.5 | 11                        | 25          | 0.4     | 2           | 60          |
| soil            | DDH5318 is 12 m<br>away, DDH4188<br>is about 40 m away | PB71       | 4.7 | 13                        | 43          | 0.4     | 4           | 68          |
| soil            | not recorded                                           | PB73       | 5.6 | 10                        | 23          | 0.4     | 1           | 71          |
| soil            | not recorded                                           | PB74       | 5.3 | 15                        | 23          | 0.4     | 1           | 73          |
| soil            | 17 m from<br>DDH4293                                   | PB75       | 5.4 | 7                         | 20          | 0.4     | 1           | 68          |
| soil            | not recorded                                           | PB77       | 6.3 | 14                        | 31          | 0.5     | 1           | 83          |
|                 |                                                        | median     | 5.3 | 12                        | 24          | 0.4     | 1           | 70          |
|                 | Soil:                                                  | min        | 4.5 | 7                         | 20          | 0.4     | 1           | 60          |
|                 |                                                        | max        | 6.3 | 15                        | 43          | 0.5     | 4           | 83          |

---
